# Supplementary material for: Magneto-optical response and luminescence properties of lanthanide–titanium–oxo clusters Eu2Ti7 and Sm2Ti7
Source: Royal Society of Chemistry journal article supplement (doi:10.1039/d4qi02645d), 2024-11-21
Supplement: d4qi02645d1.pdf [file d4qi02645d1.pdf]

## Supporting Information

### Magneto-Optical Response and Luminescence Properties of Lanthanide-Titanium-Oxo Clusters $\text{Eu}_2\text{Ti}_7$ and $\text{Sm}_2\text{Ti}_7$

Wei-Dong Liu, Han Xu, Chong-Yang Li, La-Sheng Long, Lan-Sun Zheng, and Xiang-Jian Kong\*

State Key Laboratory of Physical Chemistry of Solid Surfaces, and Department of Chemistry, College of Chemistry and Chemical Engineering, Xiamen University, Xiamen 361005, China

\*Corresponding author: [xjkong@xmu.edu.cn](mailto:xjkong@xmu.edu.cn)

#### Physical Measurements

##### X-ray Crystallography

The crystal data of  $\text{Ln}_2\text{Ti}_7$  were collected on a Rigaku Oxford Diffraction XtaLAB Synergy diffractometer with micro-focus sealed X-ray Cu-K $\alpha$  radiation ( $\lambda = 1.54184 \text{ \AA}$ ) at 100 K. Crystallography data reduction and faces absorption correction were performed using CrysAlisPro software (Rigaku Oxford Diffraction, 2015). The structures were solved by intrinsic phasing (SHEXT) and refined by full-matrix least-squares calculations based on  $F^2$  using the SHELXTL-2018 software package. All the non-hydrogen atoms were refined anisotropically. The solvent contributions to the scattering factors of  $\text{Ln}_2\text{Ti}_7$  have been taken into account with PLATON/SQUEEZE. Detailed crystal data and structure refinement parameters for  $\text{Ln}_2\text{Ti}_7$  are listed in **Table S2** in the Supporting Information.

##### Photoluminescence Measurement

The excitation and emission spectra of the room-temperature luminescence were measured on the steady-state and transient fluorescence spectrometer (FLS-1000, Edinburgh) equipped with a 450W xenon lamp. The time-resolved PL decay curve was obtained on the same instrument with a microsecond flashlamp. The absolute quantum yield was collected also on the FLS-1000 at room

temperature using a calibrated integrating sphere (coating with a PTFE-like material with a reflectance >99%) as the chamber.

### **Magnetic Circularly Polarized Luminescence (MCPL) Measurement**

The magnetic circularly polarized luminescence spectra were measured on the circularly polarized luminescence spectrometer (CPL-300, JASCO) equipped with a JASCO PM-491 compact permanent magnet (1.6 T) at room temperature. The  $1 \times 10^{-3}$  M  $\text{CH}_2\text{Cl}_2$  solution of  $\text{Eu}_2\text{Ti}_7$  was prepared.

### **Magnetic Circular Dichroism (MCD) Measurement**

The magnetic circular dichroism spectra were measured using a JASCO J-1700 equipped with a JASCO PM-491 compact permanent magnet (1.6 T) at room temperature. The  $1 \times 10^{-3}$  M  $\text{CH}_2\text{Cl}_2$  solution of  $\text{Sm}_2\text{Ti}_7$  was prepared.

### **General Instruments**

The diffuse reflectance spectra (DRS) were obtained on a UV/Vis/NIR Spectrophotometer (PerkinElmer, Lambda 1050+). Microanalyses of C, H and O elements were carried out with an Element Analyzer (EA, Flash Smart CHNS/O). Thermogravimetric analysis was prepared in  $\text{N}_2$  atmosphere using a Thermogravimetric analysis-Mass spectrometry (TGA-MS, SDT-650). The infrared spectra were recorded on an In situ FT-IR Spectrometer (Bruker Vertex 70V) utilizing a single attenuated total reflectance (ATR) accessory. Dynamic light scattering (DLS) analysis was conducted using the laser particle size analyzer (Malvern, ZSU3100). The powder X-ray diffraction (PXRD) pattern was recorded on the Rigaku Smartlab-SE diffractometer using  $\text{Cu-K}\alpha$  radiation at 25 kV and 100 mA with a scanning rate of  $5^\circ/\text{min}$ .

## Synthesis, Structure and Characteristic

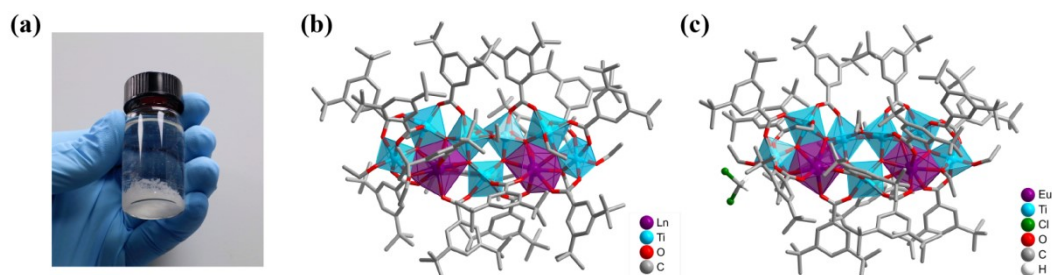

**Fig. S1** (a) The physical image of the synthesis result. Crystal structures of (b)  $\text{Ln}_2\text{Ti}_7$  (Ln = La/Sm/Eu); (c) Recrystallized  $\text{Eu}_2\text{Ti}_7$ .

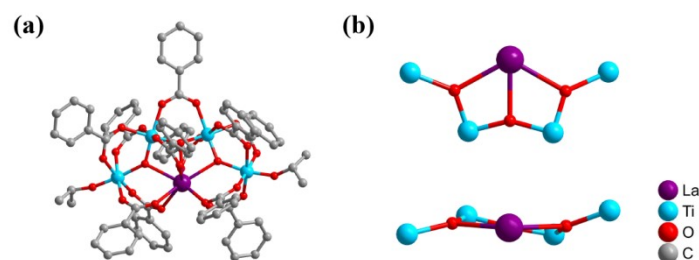

**Fig. S2** (a) Crystal structure of  $\text{LaTi}_4$ . (CCDC: 2082553) (b) Ball-and-stick depiction of metal-oxo core  $[\text{LaTi}_4(\mu_3\text{-O})_3]^{13+}$ .

**Chemicals.** In the synthesis process of the used analytically pure lanthanum(III) acetate hydrate ( $\text{La}(\text{OAc})_3 \cdot x\text{H}_2\text{O}$ ), samarium(III) acetate hydrate ( $\text{Sm}(\text{OAc})_3 \cdot x\text{H}_2\text{O}$ ), europium(III) acetate hydrate ( $\text{Eu}(\text{OAc})_3 \cdot x\text{H}_2\text{O}$ ), titanium tetraisopropanolate ( $\text{Ti}(\text{O}^i\text{Pr})_4$ ), 3,5-Di-tert-butylbenzoic acid (HL), ethanol absolute (EtOH) and dichloromethane ( $\text{CH}_2\text{Cl}_2$ ) are all the commercial sources and were received without further purification.

**Table S1.** The information on used chemicals in the synthesis process.

| Chemical                                                                          | CAS         | Formula                                                 | MW / FW     | Brand      |
|-----------------------------------------------------------------------------------|-------------|---------------------------------------------------------|-------------|------------|
| Lanthanum Acetate Hydrate ( $\text{La}(\text{OAc})_3 \cdot x\text{H}_2\text{O}$ ) | 100587-90-4 | $\text{La}(\text{OOCCH}_3)_3 \cdot x\text{H}_2\text{O}$ | 316.04 (MW) | Aladdin    |
| Samarium Acetate Hydrate ( $\text{Sm}(\text{OAc})_3 \cdot x\text{H}_2\text{O}$ )  | 100587-91-5 | $\text{Sm}(\text{OOCCH}_3)_3 \cdot x\text{H}_2\text{O}$ | 327.49 (MW) | Aladdin    |
| Europium Acetate Hydrate ( $\text{Eu}(\text{OAc})_3 \cdot x\text{H}_2\text{O}$ )  | 62667-64-5  | $\text{Eu}(\text{OOCCH}_3)_3 \cdot x\text{H}_2\text{O}$ | 329.10 (MW) | Aladdin    |
| Titanium Tetraisopropanolate ( $\text{Ti}(\text{O}^i\text{Pr})_4$ )               | 546-68-9    | $\text{Ti}[\text{OCH}(\text{CH}_3)_2]_4$                | 284.23 (FW) | Alfa Aesar |
| 3,5-Di-tert-Butylbenzoic Acid                                                     | 16225-26-6  | $\text{C}_{15}\text{H}_{22}\text{O}_2$                  | 234.33 (MW) | Bidepharm  |
| Ethanol Absolute (EtOH)                                                           | 64-17-5     | $\text{C}_2\text{H}_6\text{O}$                          | 46.07 (FW)  | SCR        |
| Dichloromethane ( $\text{CH}_2\text{Cl}_2$ )                                      | 75-09-2     | $\text{CH}_2\text{Cl}_2$                                | 84.93 (FW)  | SCR        |

## Synthesis scheme

### ***La<sub>2</sub>Ti<sub>7</sub>(μ<sub>3</sub>-O)<sub>6</sub>(L)<sub>14</sub>(EtO)<sub>8</sub> (La<sub>2</sub>Ti<sub>7</sub>)***

La(OAc)<sub>3</sub>·xH<sub>2</sub>O (63.2 mg, 0.20 mmol), 3,5-Di-tert-butylbenzoic acid (374.9 mg, 1.60 mmol) and 6 mL EtOH were added to an 8 mL vial. Then Ti(O<sup>i</sup>Pr)<sub>4</sub> (180 μL, 0.60 mmol) was added dropwise into the above mixture. The vial was sealed and sonicated for 20 min. Colorless block-shaped crystals were obtained after 2 days in a 80 °C temperature environment (36.7% yield based on La(OAc)<sub>3</sub>·xH<sub>2</sub>O). Anal. Calcd for C<sub>226</sub>H<sub>334</sub>O<sub>42</sub>La<sub>2</sub>Ti<sub>7</sub> (FW = 4336.03): C, 62.60; H, 7.75; O, 15.50 (%); Found: C, 62.57; H, 7.78; O, 15.61 (%).

### ***Sm<sub>2</sub>Ti<sub>7</sub>(μ<sub>3</sub>-O)<sub>6</sub>(L)<sub>14</sub>(EtO)<sub>8</sub> (Sm<sub>2</sub>Ti<sub>7</sub>)***

Sm(OAc)<sub>3</sub>·xH<sub>2</sub>O (98.2 mg, 0.30 mmol), 3,5-Di-tert-butylbenzoic acid (468.7 mg, 2.00 mmol) and 7 mL EtOH were added to an 8 mL vial. Then Ti(O<sup>i</sup>Pr)<sub>4</sub> (165 μL, 0.55 mmol) was added dropwise into the above mixture. The vial was sealed and sonicated for 5 min. Colorless block-shaped crystals were obtained after 1 day in a 80 °C temperature environment (42.6% yield based on Sm(OAc)<sub>3</sub>·xH<sub>2</sub>O). Anal. Calcd for C<sub>226</sub>H<sub>334</sub>O<sub>42</sub>Sm<sub>2</sub>Ti<sub>7</sub> (FW = 4358.91): C, 62.27; H, 7.71; O, 15.42 (%); Found: C, 62.32; H, 7.74; O, 15.36 (%).

### ***Eu<sub>2</sub>Ti<sub>7</sub>(μ<sub>3</sub>-O)<sub>6</sub>(L)<sub>14</sub>(EtO)<sub>8</sub> (Eu<sub>2</sub>Ti<sub>7</sub>)***

**Eu<sub>2</sub>Ti<sub>7</sub>** was synthesized by the same method nothing but the substitution of Sm(OAc)<sub>3</sub>·xH<sub>2</sub>O (98.2 mg, 0.30 mmol) to Eu(OAc)<sub>3</sub>·xH<sub>2</sub>O (98.7 mg, 0.30 mmol). Colorless block-shaped crystals were obtained after 1 day in a 80 °C temperature environment (45.8% yield based on Eu(OAc)<sub>3</sub>·xH<sub>2</sub>O). Anal. Calcd for C<sub>226</sub>H<sub>334</sub>O<sub>42</sub>Eu<sub>2</sub>Ti<sub>7</sub> (FW = 4362.13): C, 62.22; H, 7.70; O, 15.41 (%); Found: C, 62.26; H, 7.74; O, 15.31 (%).

### ***Eu<sub>2</sub>Ti<sub>7</sub>(μ<sub>3</sub>-O)<sub>6</sub>(L)<sub>14</sub>(EtO)<sub>8</sub>·CH<sub>2</sub>Cl<sub>2</sub> (Recrystallized Eu<sub>2</sub>Ti<sub>7</sub>)***

The **Eu<sub>2</sub>Ti<sub>7</sub>** sample synthesized by the solvothermal method was dissolved in dichloromethane to obtain a clarified solution. After the slow evaporation of the solvent, new colorless block-shaped crystals were formed (12.3% yield based on **Eu<sub>2</sub>Ti<sub>7</sub>**). Anal. Calcd for C<sub>227</sub>H<sub>336</sub>O<sub>42</sub>Cl<sub>2</sub>Eu<sub>2</sub>Ti<sub>7</sub> (FW = 4447.06): C, 61.30; H, 7.60; O, 15.11 (%); Found: C, 61.35; H, 7.68; O, 15.25 (%).

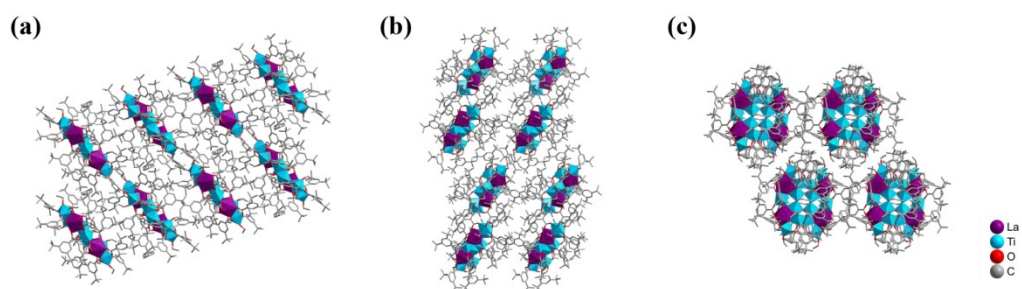

**Fig. S3** The packing structures of  $\text{La}_2\text{Ti}_7$  in (a) a-axis, (b) b-axis and (c) c-axis.

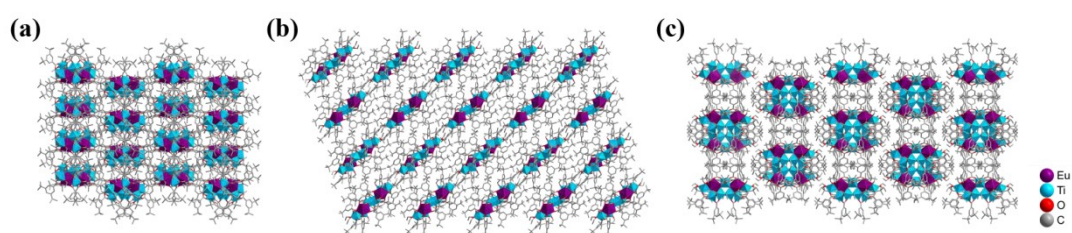

**Fig. S4** The packing structures of  $\text{Sm}_2\text{Ti}_7$  in (a) a-axis, (b) b-axis and (c) c-axis.

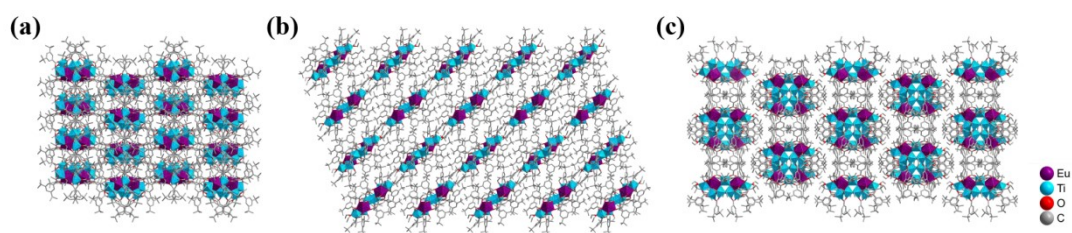

**Fig. S5** The packing structures of  $\text{Eu}_2\text{Ti}_7$  in (a) a-axis, (b) b-axis and (c) c-axis.

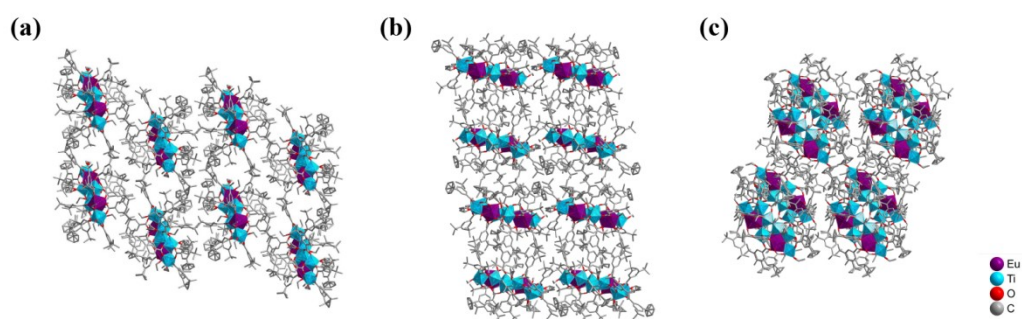

**Fig. S6** The packing structures of recrystallized  $\text{Eu}_2\text{Ti}_7$  in (a) a-axis, (b) b-axis and (c) c-axis.

**Table S2.** Single crystal structure refinements of **Ln<sub>2</sub>Ti<sub>7</sub>**.

| <b>Ln<sub>2</sub>Ti<sub>7</sub></b>      | <b>La<sub>2</sub>Ti<sub>7</sub></b>                                               | <b>Sm<sub>2</sub>Ti<sub>7</sub></b>                                               | <b>Eu<sub>2</sub>Ti<sub>7</sub></b>                                               | Recrystallized <b>Eu<sub>2</sub>Ti<sub>7</sub></b>                                                |
|------------------------------------------|-----------------------------------------------------------------------------------|-----------------------------------------------------------------------------------|-----------------------------------------------------------------------------------|---------------------------------------------------------------------------------------------------|
| CCDC                                     | 2392364                                                                           | 2392362                                                                           | 2392363                                                                           | 2392375                                                                                           |
| Empirical formula                        | C <sub>226</sub> H <sub>334</sub> O <sub>42</sub> La <sub>2</sub> Ti <sub>7</sub> | C <sub>226</sub> H <sub>334</sub> O <sub>42</sub> Sm <sub>2</sub> Ti <sub>7</sub> | C <sub>226</sub> H <sub>334</sub> O <sub>42</sub> Eu <sub>2</sub> Ti <sub>7</sub> | C <sub>227</sub> H <sub>336</sub> O <sub>42</sub> Cl <sub>2</sub> Eu <sub>2</sub> Ti <sub>7</sub> |
| Formula weight                           | 4336.03                                                                           | 4358.91                                                                           | 4362.13                                                                           | 4447.06                                                                                           |
| Temperature/K                            | 100.0(10)                                                                         | 100.01(10)                                                                        | 100.00(10)                                                                        | 106(6)                                                                                            |
| Crystal color                            | colorless                                                                         | colorless                                                                         | colorless                                                                         | colorless                                                                                         |
| Crystal system                           | triclinic                                                                         | triclinic                                                                         | monoclinic                                                                        | triclinic                                                                                         |
| Space group                              | <i>P</i> -1                                                                       | <i>P</i> -1                                                                       | <i>C</i> 2/ <i>c</i>                                                              | <i>P</i> -1                                                                                       |
| <i>a</i> /Å                              | 20.7274(5)                                                                        | 20.7017(8)                                                                        | 40.1910(13)                                                                       | 20.1724(2)                                                                                        |
| <i>b</i> /Å                              | 22.4287(5)                                                                        | 22.2762(8)                                                                        | 20.5124(5)                                                                        | 21.9592(2)                                                                                        |
| <i>c</i> /Å                              | 31.2329(6)                                                                        | 31.0854(9)                                                                        | 31.0940(11)                                                                       | 31.4923(3)                                                                                        |
| $\alpha$ /°                              | 73.684(2)                                                                         | 72.953(3)                                                                         | 90                                                                                | 95.7290(10)                                                                                       |
| $\beta$ /°                               | 87.696(2)                                                                         | 87.194(3)                                                                         | 106.338(4)                                                                        | 93.4250(10)                                                                                       |
| $\gamma$ /°                              | 62.609(2)                                                                         | 63.073(4)                                                                         | 90                                                                                | 109.2320(10)                                                                                      |
| <i>V</i> /Å <sup>3</sup>                 | 12305.0(5)                                                                        | 12160.3(9)                                                                        | 24599.2(14)                                                                       | 13042.0(2)                                                                                        |
| <i>Z</i>                                 | 2                                                                                 | 2                                                                                 | 4                                                                                 | 2                                                                                                 |
| $\rho_{\text{calc}}$ /g·cm <sup>-3</sup> | 1.170                                                                             | 1.190                                                                             | 1.178                                                                             | 1.132                                                                                             |
| $\mu$ /mm <sup>-1</sup>                  | 4.961                                                                             | 5.931                                                                             | 5.929                                                                             | 5.784                                                                                             |
| 2 $\theta$ range/°                       | 4.646 - 110.76                                                                    | 4.67 - 103.282                                                                    | 5.929 - 130.152                                                                   | 4.296 - 154.716                                                                                   |
| Reflections collected                    | 92912                                                                             | 79692                                                                             | 58644                                                                             | 180196                                                                                            |
| Data/restraints/parameters               | 30704/2912/2365                                                                   | 26124/3086/2438                                                                   | 20235/1354/1195                                                                   | 52642/3846/3054                                                                                   |
| Goodness-of-fit on F <sup>2</sup>        | 1.027                                                                             | 1.028                                                                             | 1.010                                                                             | 1.053                                                                                             |
| Final R indexes                          | R <sub>1</sub> = 0.1160,                                                          | R <sub>1</sub> = 0.1156,                                                          | R <sub>1</sub> = 0.1261,                                                          | R <sub>1</sub> = 0.0673,                                                                          |
| [I >= 2 $\sigma$ (I)] <sup>a</sup>       | wR <sub>2</sub> = 0.2991                                                          | wR <sub>2</sub> = 0.3034                                                          | wR <sub>2</sub> = 0.3288                                                          | wR <sub>2</sub> = 0.1840                                                                          |
| Final R indexes                          | R <sub>1</sub> = 0.1896,                                                          | R <sub>1</sub> = 0.2042,                                                          | R <sub>1</sub> = 0.1780,                                                          | R <sub>1</sub> = 0.0822,                                                                          |
| [all data] <sup>b</sup>                  | wR <sub>2</sub> = 0.3457                                                          | wR <sub>2</sub> = 0.3564                                                          | wR <sub>2</sub> = 0.3688                                                          | wR <sub>2</sub> = 0.1955                                                                          |

$${}^a R_1 = \sum (| |F_o| - |F_c| |) / \sum |F_o|; {}^b wR_2 = \{ \sum [w (F_o^2 - F_c^2)^2] / \sum [w (F_o^2)^2] \}^{1/2};$$

$$w = 1/[{}^2(F_o)^2 + (aP)^2 + bP] \text{ and } P = (F_o^2 + 2F_c^2)/3.$$

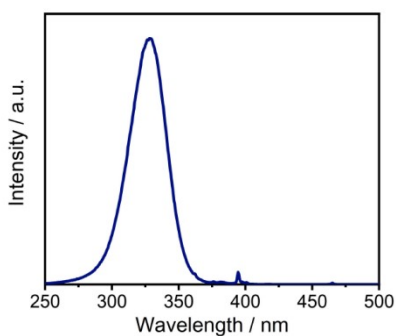

**Fig. S7** Excitation spectrum of the CH<sub>2</sub>Cl<sub>2</sub> solution of Eu<sub>2</sub>Ti<sub>7</sub> with concentration  $1 \times 10^{-3}$  M.

**Table S3.** The prominent  $g_{lum}$  and  $g_{MCPL}$  values versus wavelengths in MCPL of Eu<sub>2</sub>Ti<sub>7</sub>.

| f-f transition                                            | Wavelength / nm | $g_{lum}$ (1.6 T) |         | $g_{MCPL}$ (T <sup>-1</sup> ) |         |
|-----------------------------------------------------------|-----------------|-------------------|---------|-------------------------------|---------|
|                                                           |                 | N→S               | S→N     | N→S                           | S→N     |
| <sup>5</sup> D <sub>0</sub> → <sup>7</sup> F <sub>1</sub> | 586             | 0.0236            | -0.0226 | 0.0148                        | -0.0141 |
|                                                           | 599             | -0.0219           | 0.0212  | -0.0137                       | 0.0133  |
| <sup>5</sup> D <sub>0</sub> → <sup>7</sup> F <sub>2</sub> | 612             | -0.0121           | 0.0103  | -0.0076                       | 0.0064  |
|                                                           | 625             | 0.0130            | -0.0123 | 0.0081                        | -0.0077 |
| <sup>5</sup> D <sub>0</sub> → <sup>7</sup> F <sub>4</sub> | 695             | -0.0402           | 0.0353  | -0.0251                       | 0.0221  |
|                                                           | 709             | 0.0610            | -0.0634 | 0.0381                        | -0.0396 |

Calculates  $g_{lum}$  and Delta I from the CPL signal (y-axis is CD [mdeg]) and DC signal (y-axis is DC [V]). This calculation uses an equation to convert the CPL signal. Note: Use this function only for CPL data obtained using the CPL instruments.

$$\Delta I = CD \text{ [mdeg]} \times 0.000069813$$

$$g_{lum} = \Delta I / I = CD \text{ [mdeg]} \div DC \text{ [V]} \times 0.000069813$$

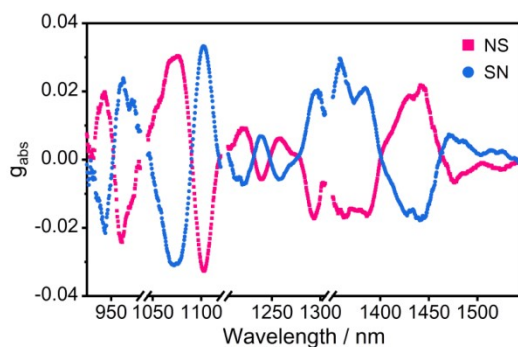

**Fig. S8** Correspondence between  $g_{abs}$  value and wavelength in MCD of  $\text{Sm}_2\text{Ti}_7$ .

**Table S4.** The prominent  $g_{abs}$  and  $g_{MCD}$  values versus wavelengths in MCD of  $\text{Sm}_2\text{Ti}_7$ .

| f-f transition                                       | Wavelength / nm | $g_{abs}$ (1.6 T) |         | $g_{MCD}$ ( $\text{T}^{-1}$ ) |         |
|------------------------------------------------------|-----------------|-------------------|---------|-------------------------------|---------|
|                                                      |                 | N→S               | S→N     | N→S                           | S→N     |
| ${}^6\text{H}_{5/2} \rightarrow {}^6\text{F}_{11/2}$ | 944             | 0.0198            | -0.0216 | 0.0124                        | -0.0135 |
|                                                      | 962             | -0.0242           | 0.0239  | -0.0151                       | 0.0149  |
| ${}^6\text{H}_{5/2} \rightarrow {}^6\text{F}_{9/2}$  | 1076            | 0.0304            | -0.0310 | 0.0190                        | -0.0194 |
|                                                      | 1102            | -0.0327           | 0.0332  | -0.0204                       | 0.0208  |
| ${}^6\text{H}_{5/2} \rightarrow {}^6\text{F}_{7/2}$  | 1220            | 0.0093            | -0.0074 | 0.0058                        | -0.0046 |
|                                                      | 1239            | -0.0058           | 0.0068  | -0.0036                       | 0.0043  |
|                                                      | 1257            | 0.0062            | -0.0058 | 0.0039                        | -0.0036 |
| ${}^6\text{H}_{5/2} \rightarrow {}^6\text{F}_{5/2}$  | 1296            | -0.0173           | 0.0201  | -0.0108                       | 0.0126  |
|                                                      | 1360            | -0.0160           | 0.0296  | -0.0100                       | 0.0185  |
|                                                      | 1385            | -0.0166           | 0.0211  | -0.0104                       | 0.0132  |
| ${}^6\text{H}_{5/2} \rightarrow {}^6\text{F}_{3/2}$  | 1442            | 0.0219            | -0.0175 | 0.0137                        | -0.0109 |
| ${}^6\text{H}_{5/2} \rightarrow {}^6\text{F}_{1/2}$  | 1476            | -0.0068           | 0.0074  | -0.0043                       | 0.0046  |

Calculates  $g_{abs}$  and Delta A from the CD signal (y-axis is CD [mdeg]) and Abs signal. This calculation uses an equation to convert the CD signal. Note: Use this function only for CD data obtained using the CD instruments.

$$\Delta A = \text{CD [mdeg]} / 32982$$

$$g_{abs} = \Delta A / A = (\text{CD [mdeg]} / 32982) \div \text{Abs}$$



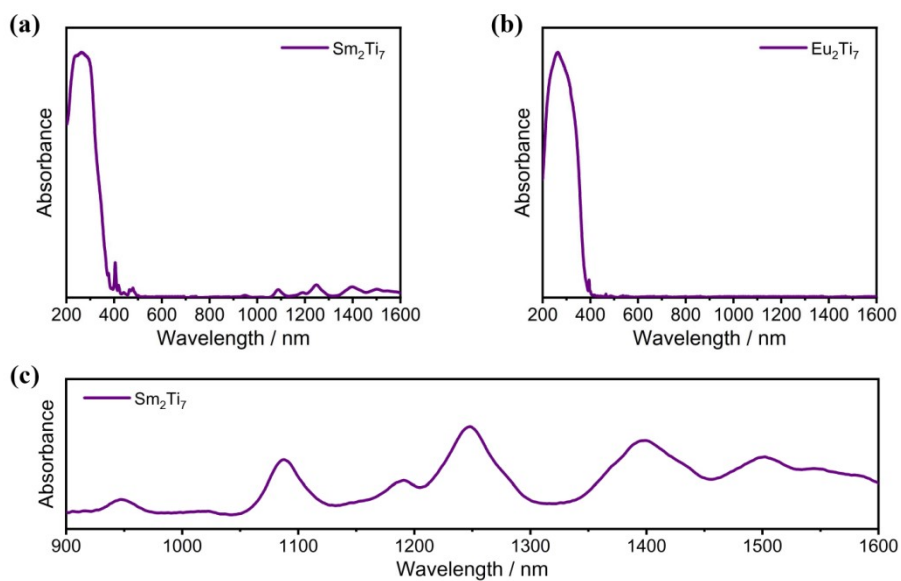

**Fig. S9** (a) & (c) The solid diffuse reflectance spectra (DRS) of  $\text{Sm}_2\text{Ti}_7$  from 200 to 1600 nm and 900 to 1600 nm; (b) The solid DRS of  $\text{Eu}_2\text{Ti}_7$  from 200 to 1600 nm.

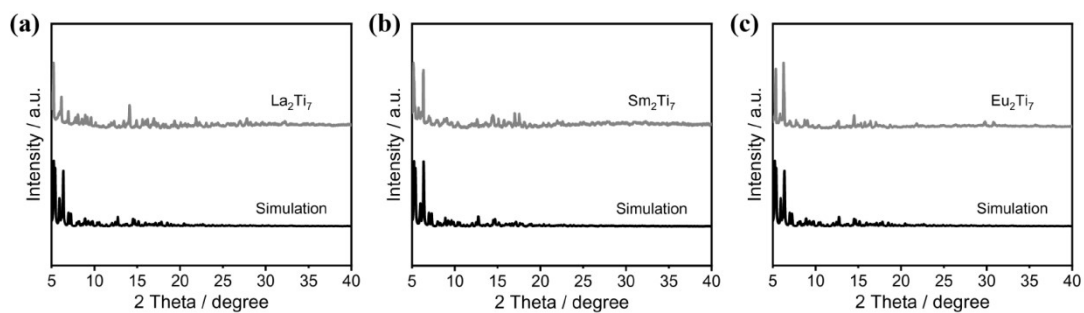

**Fig. S10** The powder X-ray diffraction (PXRD) of  $\text{Ln}_2\text{Ti}_7$ : Ln = (a) La; (b) Sm; (c) Eu.

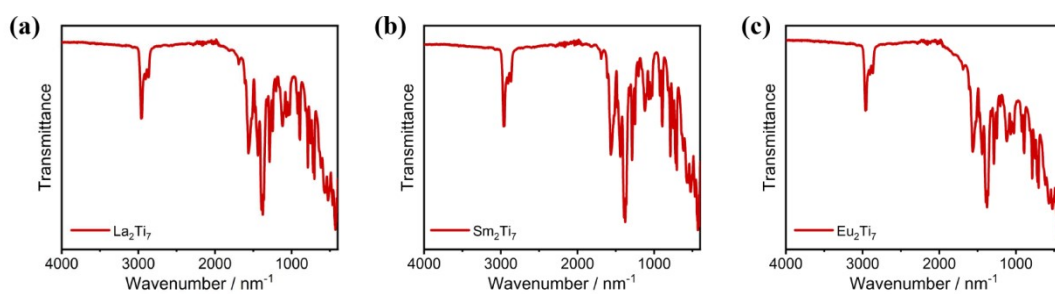

**Fig. S11** The fourier transform infrared (FT-IR) spectra of  $\text{Ln}_2\text{Ti}_7$ : Ln = (a) La; (b) Sm; (c) Eu.

The FT-IR spectra of  $\text{Ln}_2\text{Ti}_7$  have similar peak shapes.  $\text{La}_2\text{Ti}_7$  FT-IR ( $\text{cm}^{-1}$ ): 2960 (s), 2905 (m), 2868 (m), 1690 (w), 1609 (s), 1564 (s), 1476 (s), 1439 (s), 1392 (vs), 1378 (vs), 1361 (vs), 1316 (s), 1287 (s), 1247 (s), 1200 (m), 1118 (s), 1068 (s), 1043 (s), 1025 (s), 921 (s), 892 (s), 820 (s), 786 (s), 751 (s), 718 (s), 703 (s), 614 (s), 569 (s), 549 (s), 524 (s), 466 (s), 429 (vs).  $\text{Sm}_2\text{Ti}_7$  FT-IR ( $\text{cm}^{-1}$ ): 2961 (s), 2904 (m), 2867 (m), 1691 (w), 1609 (s), 1564 (s), 1477 (s), 1441 (s), 1391 (vs), 1378 (vs), 1361 (vs), 1316 (s), 1288 (s), 1246 (s), 1201 (m), 1118 (s), 1068 (s), 1042 (s), 1026 (s), 922 (s), 892 (s), 818 (s), 787 (s), 751 (s), 718 (s), 703 (s), 616 (s), 569 (s), 548 (s), 524 (s), 466 (s), 429 (vs), 407 (vs).  $\text{Eu}_2\text{Ti}_7$  FT-IR ( $\text{cm}^{-1}$ ): 2960 (s), 2904 (m), 2866 (m), 1691 (w), 1609 (s), 1564 (s), 1478 (s), 1441 (s), 1391 (vs), 1378 (vs), 1361 (vs), 1316 (s), 1288 (s), 1246 (s), 1201 (m), 1118 (s), 1068 (s), 1040 (s), 1026 (s), 921 (s), 891 (s), 819 (s), 787 (s), 750 (s), 718 (s), 703 (s), 616 (s), 569 (s), 548 (s), 524 (s), 466 (s), 429 (vs), 404 (vs).  $\text{La}_2\text{Ti}_7$  is taken as an example for analysis. The absorptions at  $2960\text{ cm}^{-1}$ ,  $2905\text{ cm}^{-1}$ , and  $2868\text{ cm}^{-1}$  are due to the C-H stretching vibrations of  $-\text{CH}_3$  and  $-\text{CH}_2-$  on the carboxylic acid ligands and EtO-. The absorption at  $\sim 1250\text{ cm}^{-1}$  belongs to the bending vibration of  $-\text{C}(\text{CH}_3)_3$  of the carboxylic acid ligands. In addition, the absorptions of the skeletal vibrations of the benzene ring of the carboxylic acid ligands are in the range of  $1650\text{--}1450\text{ cm}^{-1}$ , the absorptions of the C-H stretching vibrations are at  $\sim 3000\text{ cm}^{-1}$ , and the absorptions of the C-H bending vibrations are in the range of  $910\text{--}650\text{ cm}^{-1}$ . The absorptions at  $\sim 1400\text{ cm}^{-1}$  and  $1610\text{--}1500\text{ cm}^{-1}$  are attributed to the symmetric and antisymmetric stretching vibrations of the carbonyl C=O after the carboxylic acid ligands are deprotonated, and both are relatively strong absorptions. The other absorption peaks in the band of  $1060\text{ cm}^{-1}$  to  $400\text{ cm}^{-1}$  are mainly attributed to the metal-oxygen vibrations.

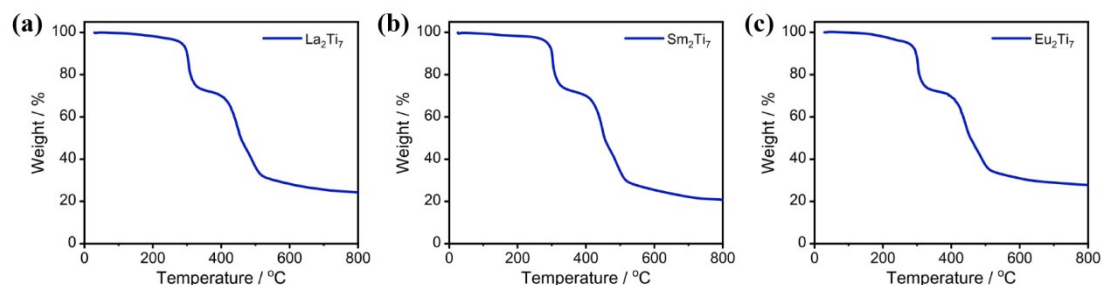

**Fig. S12** The thermo gravimetric analysis (TGA) curves of  $\text{Ln}_2\text{Ti}_7$ : Ln = (a) La; (b) Sm; (c) Eu.

The TGA curves of  $\text{Ln}_2\text{Ti}_7$  have similar shapes and trends. The weight loss rates of  $\text{La}_2\text{Ti}_7/\text{Sm}_2\text{Ti}_7/\text{Eu}_2\text{Ti}_7$  in the range of room temperature to 280 °C are 4.7%, 3.8% and 5.1% respectively, which are due to the departure of solvent molecules. The curves of  $\text{Ln}_2\text{Ti}_7$  drop sharply between 280 and 320 °C with weight loss of approximately 25%, indicating the initial decomposition of carboxylic acid ligands. From 320 and 400 °C, the weight loss rate slows down, though additional loss of around 5% occurs. Between 400 and 520 °C,  $\text{Ln}_2\text{Ti}_7$  begins to disintegrate completely, and the curves show a significant drop, which is attributed to the complete decomposition of carboxylic acid ligands and the collapse of the metal-oxo frameworks. When the temperature is higher than 520 °C, the curves remain basically stable, and at this time the samples mainly exist in the form of metal oxides. The final residual weights for  $\text{La}_2\text{Ti}_7/\text{Sm}_2\text{Ti}_7/\text{Eu}_2\text{Ti}_7$  are 24.2%, 23.1% and 27.8% respectively.

**Table S5.** Selected bond distances (Å) of **La<sub>2</sub>Ti<sub>7</sub>**.

| Atom-Atom | Length/Å   | Atom-Atom | Length/Å   |
|-----------|------------|-----------|------------|
| La1—O8    | 2.523 (8)  | La2—O1    | 2.451 (9)  |
| La1—O22   | 2.464 (10) | La2—O16   | 2.611 (9)  |
| La1—O24   | 2.495 (10) | La2—O20   | 2.515 (9)  |
| La1—O36   | 2.490 (10) | La2—O3    | 2.518 (12) |
| La1—O40   | 2.447 (9)  | La2—O25   | 2.510 (9)  |
| La1—O13   | 2.559 (8)  | La2—O2    | 2.464 (12) |
| La1—O7    | 2.522 (9)  | La2—O35   | 2.467 (10) |
| La1—O29   | 2.583 (9)  | La2—O9    | 2.542 (13) |
| Ti1—O12   | 1.989 (10) | Ti7—O6    | 1.995 (10) |
| Ti1—O16   | 1.803 (8)  | Ti7—O14   | 2.068 (10) |
| Ti1—O28   | 2.134 (9)  | Ti7—O16   | 1.927 (8)  |
| Ti1—O42   | 1.975 (9)  | Ti7—O20   | 1.807 (9)  |
| Ti1—O13   | 1.820 (10) | Ti7—O32   | 1.926 (9)  |
| Ti1—O19   | 2.064 (14) | Ti7—O34   | 2.025 (9)  |
| Ti4—O4    | 2.041 (11) | Ti2—O8    | 1.952 (10) |
| Ti4—O8    | 1.755 (9)  | Ti2—O26   | 2.089 (12) |
| Ti4—O14   | 1.947 (9)  | Ti2—O40   | 1.822 (9)  |
| Ti4—O18   | 1.984 (9)  | Ti2—O15   | 2.065 (12) |
| Ti4—O32   | 2.077 (9)  | Ti2—O33   | 2.057 (11) |
| Ti4—O13   | 1.902 (9)  | Ti2—O37   | 1.799 (11) |
| Ti6—O1    | 1.832 (10) | Ti5—O30   | 2.019 (13) |
| Ti6—O10   | 2.101 (10) | Ti5—O40   | 1.969 (9)  |
| Ti6—O20   | 1.903 (9)  | Ti5—O11   | 1.805 (11) |
| Ti6—O38   | 2.105 (11) | Ti5—O27   | 2.068 (13) |
| Ti6—O21   | 1.781 (10) | Ti5—O29   | 1.858 (10) |
| Ti6—O23   | 2.067 (11) | Ti5—O17   | 2.102 (11) |
| Ti3—O1    | 1.953 (10) | Ti3—O39   | 1.810 (12) |
| Ti3—O31   | 1.989 (11) | Ti3—O5    | 1.992 (12) |
| Ti3—O9    | 1.851 (13) | Ti3—O41   | 2.103 (13) |

**Table S6.** Selected bond angles (°) of **La<sub>2</sub>Ti<sub>7</sub>**.

|            |          |             |          |
|------------|----------|-------------|----------|
| Ti6-O1-La2 | 107.7(4) | Ti6-O20-La2 | 103.0(4) |
| Ti6-O1-Ti3 | 133.0(4) | Ti7-O20-La2 | 106.6(4) |
| Ti3-O1-La2 | 107.0(4) | Ti7-O20-Ti6 | 146.0(5) |
| Ti4-O8-La1 | 108.0(4) | Ti2-O40-La1 | 109.3(4) |
| Ti4-O8-Ti2 | 144.9(6) | Ti2-O40-Ti5 | 131.7(6) |

|             |          |             |          |
|-------------|----------|-------------|----------|
| Ti2-O8-La1  | 102.2(4) | Ti5-O40-La1 | 105.7(3) |
| Ti1-O16-La2 | 119.0(4) | Ti1-O13-La1 | 116.0(4) |
| Ti1-O16-Ti7 | 137.2(6) | Ti1-O13-Ti4 | 138.1(5) |
| Ti7-O16-La2 | 99.4(3)  | Ti4-O13-La1 | 102.0(4) |

**Table S7.** Selected bond distances (Å) of **Sm<sub>2</sub>Ti<sub>7</sub>**.

|         |            |         |            |
|---------|------------|---------|------------|
| Sm1—O8  | 2.529 (10) | Sm2—O20 | 2.423 (10) |
| Sm1—O10 | 2.350 (11) | Sm2—O30 | 2.532 (11) |
| Sm1—O12 | 2.420 (9)  | Sm2—O32 | 2.359 (11) |
| Sm1—O16 | 2.526 (10) | Sm2—O11 | 2.413 (12) |
| Sm1—O34 | 2.385 (12) | Sm2—O23 | 2.330 (13) |
| Sm1—O36 | 2.453 (10) | Sm2—O25 | 2.396 (12) |
| Sm1—O7  | 2.402 (11) | Sm2—O13 | 2.440 (13) |
| Sm1—O33 | 2.392 (11) | Sm2—O37 | 2.528 (12) |
| Ti1—O1  | 1.978 (10) | Ti7—O10 | 1.881 (11) |
| Ti1—O6  | 2.056 (12) | Ti7—O12 | 1.960 (11) |
| Ti1—O8  | 1.903 (9)  | Ti7—O26 | 2.107 (14) |
| Ti1—O12 | 1.756 (11) | Ti7—O28 | 2.080 (14) |
| Ti1—O38 | 1.972 (11) | Ti7—O29 | 1.792 (14) |
| Ti1—O42 | 2.051 (12) | Ti7—O15 | 2.077 (12) |
| Ti4—O4  | 1.983 (13) | Ti2—O10 | 1.893 (11) |
| Ti4—O8  | 1.834 (10) | Ti2—O14 | 2.023 (13) |
| Ti4—O30 | 1.836 (10) | Ti2—O16 | 1.859 (12) |
| Ti4—O40 | 1.961 (14) | Ti2—O3  | 2.109 (14) |
| Ti4—O27 | 2.125 (11) | Ti2—O2  | 2.006 (14) |
| Ti4—O41 | 2.056 (13) | Ti2—O19 | 1.861 (13) |
| Ti6—O1  | 2.069 (12) | Ti5—O20 | 1.868 (11) |
| Ti6—O6  | 1.983 (11) | Ti5—O22 | 2.074 (13) |
| Ti6—O18 | 2.096 (11) | Ti5—O32 | 1.852 (11) |
| Ti6—O20 | 1.833 (11) | Ti5—O21 | 2.074 (13) |
| Ti6—O24 | 1.995 (11) | Ti5—O31 | 2.083 (14) |
| Ti6—O30 | 1.917 (11) | Ti5—O35 | 1.769 (15) |
| Ti3—O32 | 1.939 (12) | Ti3—O37 | 1.929 (15) |
| Ti3—O17 | 1.982 (15) | Ti3—O39 | 2.005 (14) |
| Ti3—O9  | 2.089 (15) | Ti3—O5  | 1.783 (15) |

**Table S8.** Selected bond angles (°) of **Sm<sub>2</sub>Ti<sub>7</sub>**.

|            |         |             |          |
|------------|---------|-------------|----------|
| Ti1-O8-Sm1 | 99.4(4) | Ti6-O20-Sm2 | 105.6(5) |
|------------|---------|-------------|----------|

|             |          |             |          |
|-------------|----------|-------------|----------|
| Ti4-O8-Sm1  | 117.5(4) | Ti6-O20-Ti5 | 146.5(6) |
| Ti4-O8-Ti1  | 137.3(5) | Ti5-O20-Sm2 | 103.8(5) |
| Ti7-O10-Sm1 | 107.5(5) | Ti4-O30-Sm2 | 121.6(5) |
| Ti7-O10-Ti2 | 130.9(5) | Ti4-O30-Ti6 | 134.4(6) |
| Ti2-O10-Sm1 | 108.6(5) | Ti6-O30-Sm2 | 99.0(4)  |
| Ti1-O12-Sm1 | 108.1(5) | Ti5-O32-Sm2 | 106.7(5) |
| Ti1-O12-Ti7 | 146.1(6) | Ti5-O32-Ti3 | 133.4(6) |
| Ti7-O12-Sm1 | 102.3(4) | Ti3-O32-Sm2 | 107.4(5) |

**Table S9.** Selected bond distances (Å) of **Eu<sub>2</sub>Ti<sub>7</sub>**.

|         |            |         |            |
|---------|------------|---------|------------|
| Eu1—O1  | 2.507 (7)  | Ti1—O1  | 1.842 (7)  |
| Eu1—O10 | 2.394 (7)  | Ti1—O6  | 1.981 (7)  |
| Eu1—O12 | 2.404 (8)  | Ti1—O7  | 2.055 (9)  |
| Eu1—O14 | 2.302 (8)  | Ti4—O1  | 1.914 (7)  |
| Eu1—O16 | 2.353 (8)  | Ti4—O4  | 1.943 (7)  |
| Eu1—O20 | 2.424 (9)  | Ti4—O8  | 2.001 (7)  |
| Eu1—O21 | 2.389 (8)  | Ti4—O10 | 1.790 (8)  |
| Eu1—O13 | 2.524 (10) | Ti4—O18 | 2.054 (8)  |
| Ti2—O10 | 1.927 (7)  | Ti3—O14 | 1.975 (9)  |
| Ti2—O14 | 1.857 (9)  | Ti3—O13 | 1.907 (11) |
| Ti2—O11 | 2.102 (11) | Ti3—O2  | 2.021 (12) |
| Ti2—O3  | 1.787 (9)  | Ti3—O17 | 2.042 (13) |
| Ti2—O15 | 2.113 (9)  | Ti3—O9  | 2.068 (12) |
| Ti2—O19 | 1.986 (11) | Ti3—O5  | 1.787 (12) |

**Table S10.** Selected bond angles (°) of **Eu<sub>2</sub>Ti<sub>7</sub>**.

|             |          |             |          |
|-------------|----------|-------------|----------|
| Ti1-O1-Eu1  | 121.0(3) | Ti4-O10-Eu1 | 108.0(3) |
| Ti1-O1-Ti4  | 134.1(4) | Ti4-O10-Ti2 | 143.4(4) |
| Ti4-O1-Eu1  | 99.8(3)  | Ti2-O10-Eu1 | 103.6(3) |
| Ti2-O14-Eu1 | 109.6(4) | Ti3-O14-Eu1 | 107.4(4) |
| Ti2-O14-Ti3 | 129.4(4) |             |          |

**Table S11.** Selected bond distances (Å) of recrystallized **Eu<sub>2</sub>Ti<sub>7</sub>**.

|         |           |         |           |
|---------|-----------|---------|-----------|
| Eu1—O8  | 2.397 (3) | Eu2—O24 | 2.388 (3) |
| Eu1—O22 | 2.351 (3) | Eu2—O26 | 2.382 (3) |
| Eu1—O30 | 2.577 (3) | Eu2—O32 | 2.387 (3) |
| Eu1—O34 | 2.364 (3) | Eu2—O40 | 2.409 (3) |

|         |           |         |           |
|---------|-----------|---------|-----------|
| Eu1—O23 | 2.333 (3) | Eu2—O3  | 2.530 (3) |
| Eu1—O27 | 2.327 (3) | Eu2—O13 | 2.355 (3) |
| Eu1—O2  | 2.452 (3) | Eu2—O7  | 2.363 (3) |
| Eu1—O33 | 2.459 (3) | Eu2—O39 | 2.497 (3) |
| Ti1—O1  | 2.058 (3) | Ti7—O18 | 1.994 (3) |
| Ti1—O4  | 1.951 (3) | Ti7—O30 | 1.810 (3) |
| Ti1—O6  | 2.000 (3) | Ti7—O43 | 2.053 (3) |
| Ti1—O8  | 1.781 (3) | Ti7—O3  | 1.840 (3) |
| Ti1—O14 | 2.053 (3) | Ti7—O17 | 1.980 (3) |
| Ti1—O30 | 1.922 (3) | Ti7—O37 | 2.070 (3) |
| Ti4—O8  | 1.946 (3) | Ti2—O10 | 2.080 (3) |
| Ti4—O22 | 1.822 (3) | Ti2—O20 | 2.079 (3) |
| Ti4—O36 | 2.112 (3) | Ti2—O24 | 1.931 (3) |
| Ti4—O25 | 2.043 (3) | Ti2—O26 | 1.833 (3) |
| Ti4—O29 | 2.040 (3) | Ti2—O35 | 2.047 (3) |
| Ti4—O31 | 1.792 (3) | Ti2—O19 | 1.791 (4) |
| Ti6—O1  | 1.954 (3) | Ti5—O12 | 2.041 (3) |
| Ti6—O4  | 2.049 (3) | Ti5—O22 | 1.940 (3) |
| Ti6—O16 | 1.998 (3) | Ti5—O28 | 1.979 (3) |
| Ti6—O24 | 1.781 (3) | Ti5—O38 | 2.080 (3) |
| Ti6—O3  | 1.903 (3) | Ti5—O42 | 1.804 (3) |
| Ti6—O15 | 2.047 (3) | Ti5—O33 | 1.877 (3) |
| Ti3—O26 | 1.932 (3) | Ti3—O39 | 1.879 (4) |
| Ti3—O11 | 2.040 (3) | Ti3—O5  | 2.015 (4) |
| Ti3—O9  | 2.089 (4) | Ti3—O41 | 1.829 (4) |

**Table S12.** Selected bond angles (°) of recrystallized **Eu<sub>2</sub>Ti<sub>7</sub>**.

|             |            |             |            |
|-------------|------------|-------------|------------|
| Ti1-O8-Eu1  | 107.55(12) | Ti2-O26-Eu2 | 107.30(12) |
| Ti1-O8-Ti4  | 144.85(16) | Ti2-O26-Ti3 | 132.43(17) |
| Ti4-O8-Eu1  | 102.91(11) | Ti3-O26-Eu2 | 105.52(14) |
| Ti4-O22-Eu1 | 108.86(12) | Ti1-O30-Eu1 | 96.68(10)  |
| Ti4-O22-Ti5 | 133.30(15) | Ti7-O30-Eu1 | 124.51(13) |
| Ti5-O22-Eu1 | 106.03(13) | Ti7-O30-Ti1 | 135.73(16) |
| Ti6-O24-Eu2 | 106.38(13) | Ti6-O3-Eu2  | 97.48(11)  |
| Ti6-O24-Ti2 | 147.63(17) | Ti7-O3-Eu2  | 120.16(13) |
| Ti2-O24-Eu2 | 103.78(11) | Ti7-O3-Ti6  | 136.03(15) |
